# Supplementary material
Source: publisher site journal article supplement (https://www.spandidos-publications.com/6044/downloadSupplementary)

Figure S1. Peripheral immune cells before and after MWA. Proportion of (A) CD3<sup>+</sup> and (B) CD4<sup>+</sup> T, (C) NK and (D) B cells in peripheral blood before and after ablation. Levels of (E) B and (F) CD8<sup>+</sup> T cells in peripheral blood before and after ablation. (G) Flow cytometry analysis of CD3<sup>+</sup> T cells in peripheral blood of patients with advanced stage disease before and after ablation. MWA, microwave ablation; NK, natural killer; ns, not significant; SSC, side scatter.

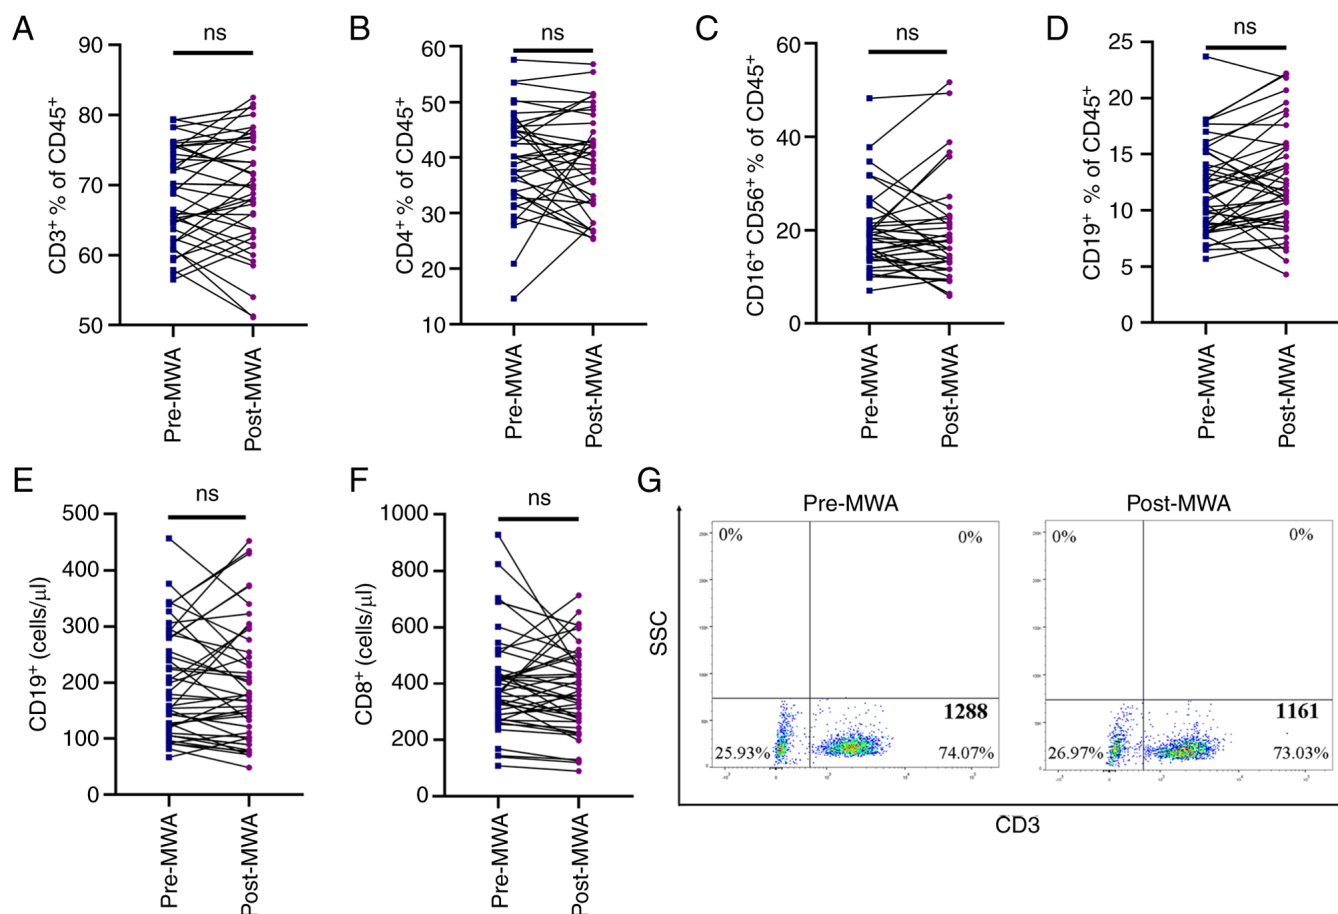

Figure S2. Flow cytometry analysis of immune cells in peripheral blood of patients with lung cancer before and after ablation. Flow cytometry analysis of (A) CD45<sup>+</sup>, (B) CD3<sup>+</sup> T, (C) NK, B, (D) CD4<sup>+</sup> and CD8<sup>+</sup> T cells in peripheral blood before and after ablation. MWA, microwave ablation; SSC, side scatter.

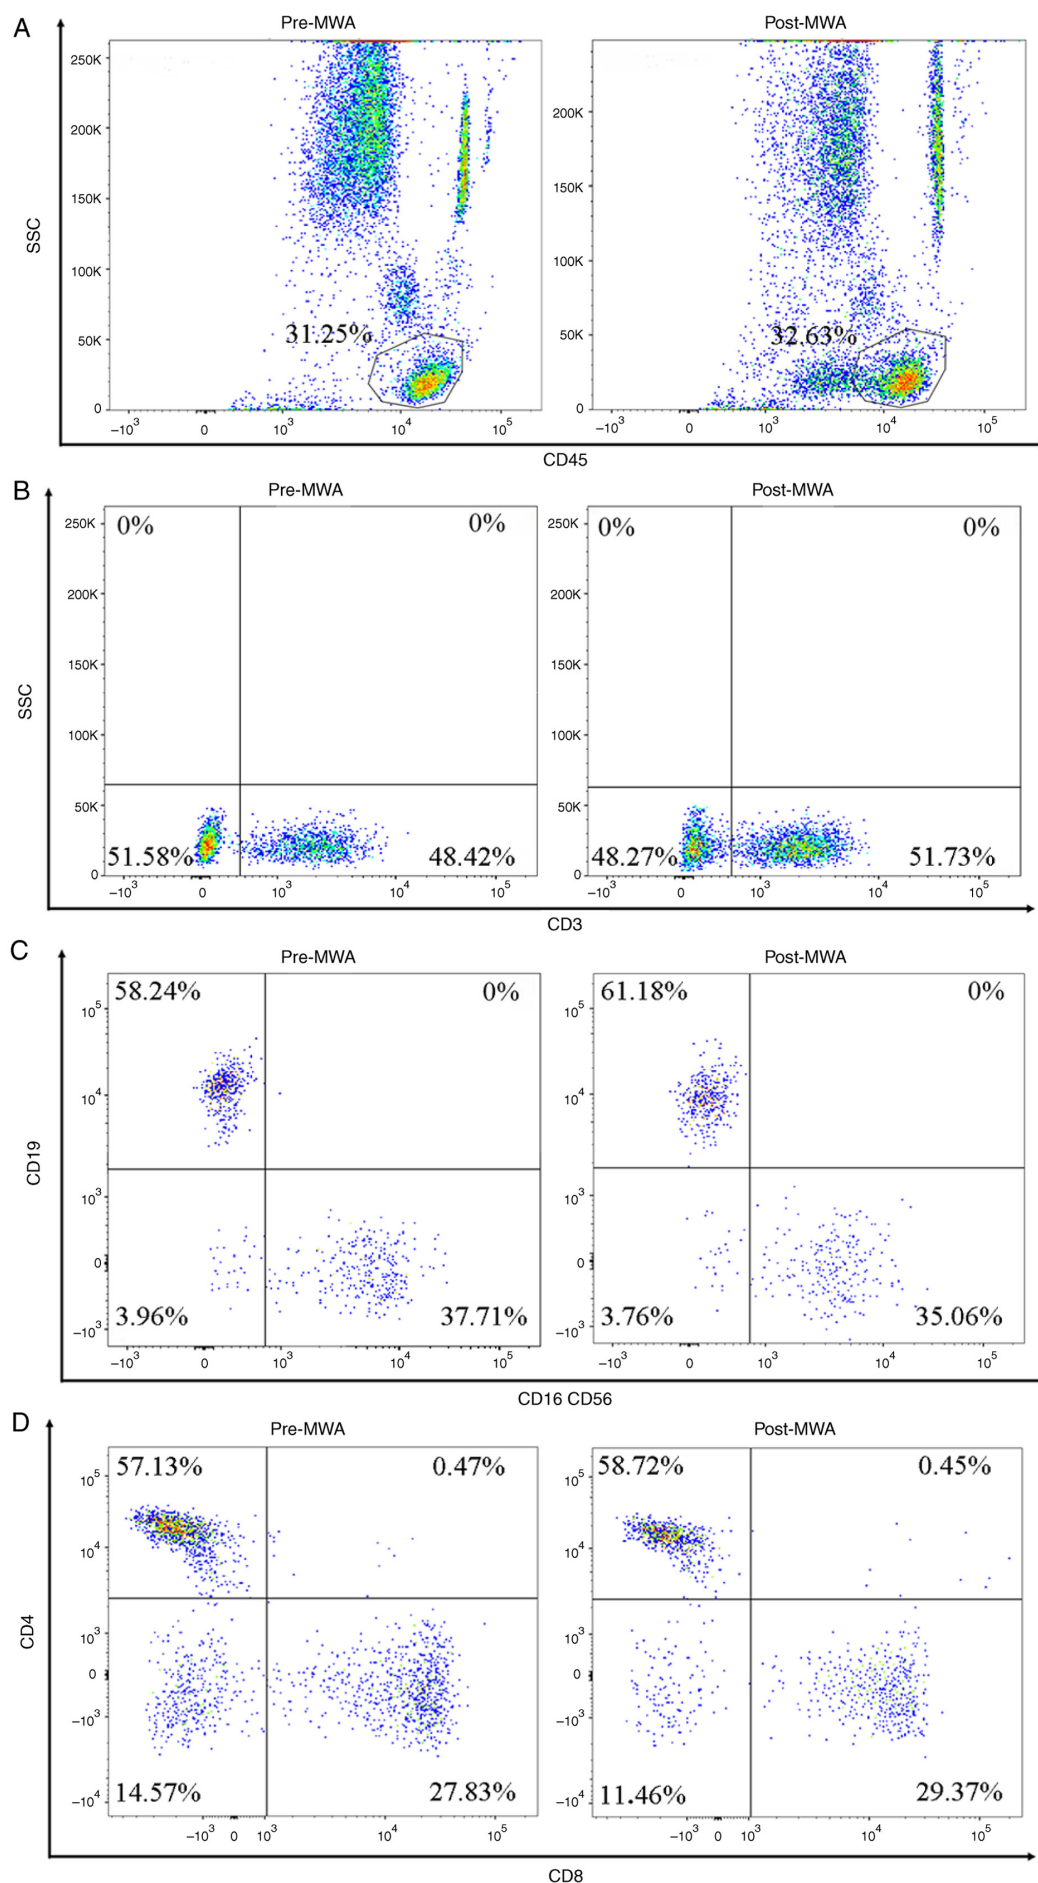

Figure S3. Peripheral cytokines before and after MWA. Levels of (A) IL-4, (B) IL-10, (C) IL-5, (D) IL-8, (E) IL-17A, (F) IL-17F and (G) TNF- $\beta$  following ablation. MWA, microwave ablation; ns, not significant.

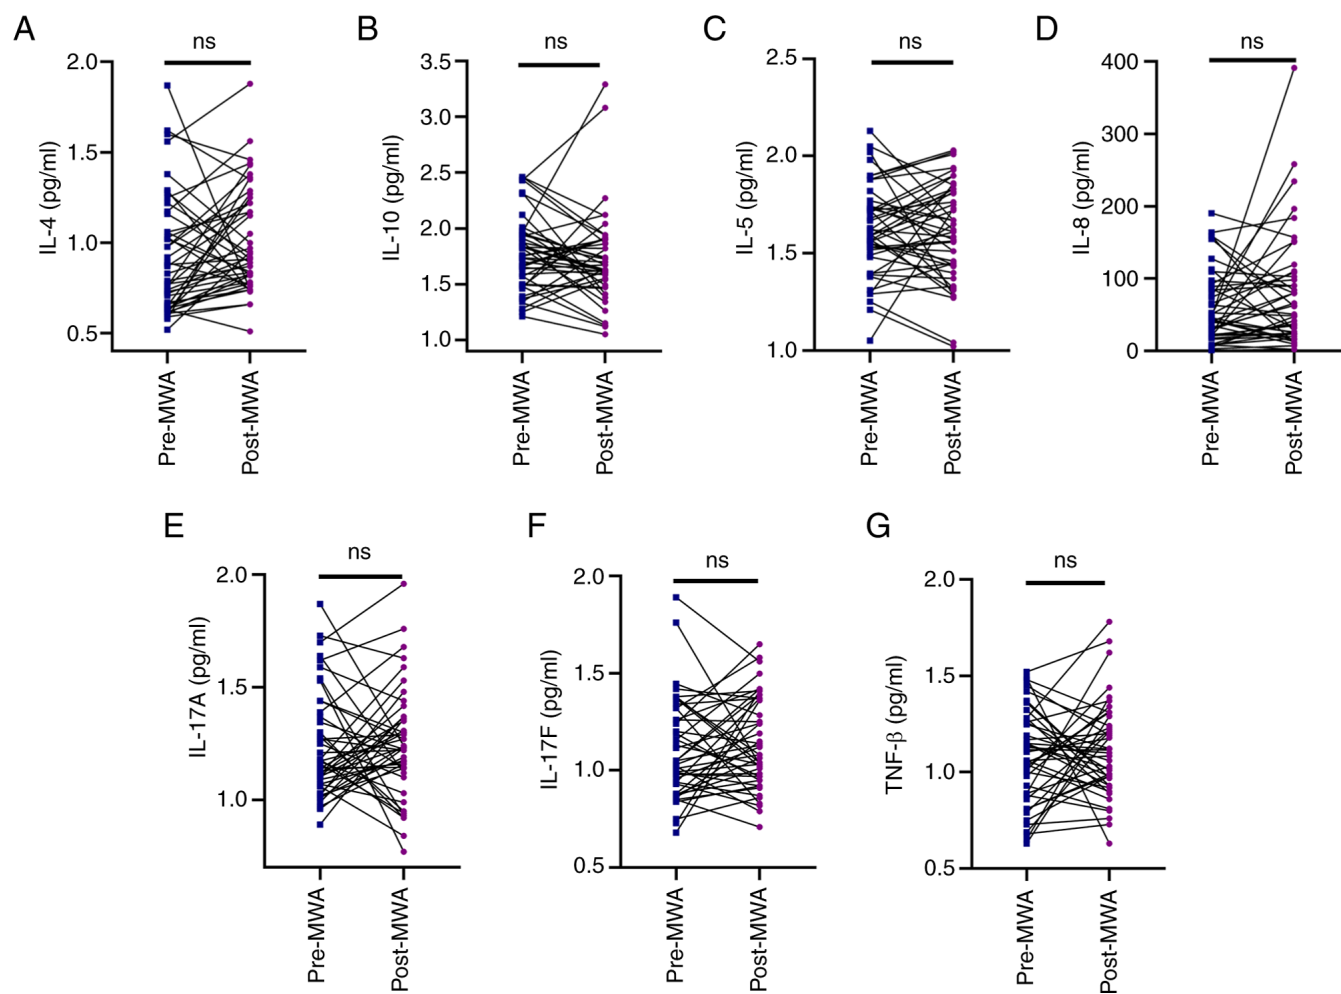

Supplement: Supplementary file 1 [file downloadSupplementary]
